# Supplementary material
Source: MDPI journal article supplement (doi:10.3390/app16115334)
Supplement: s1 [file applsci-4228165-supplementary.pdf › applsci-4228165-supplementary.pdf]

## Supplementary Tables

**Table S1.** Content of each phenolic compound and total phenolics of flours from bean and rice co-products cultivated with macrofungi.

| Compound<br>(mg/g)     | CF                                 | CFA                                | 102F                              | 102AF                              | 134F                              | 134AF                              | 161F                               | 161AF                              |
|------------------------|------------------------------------|------------------------------------|-----------------------------------|------------------------------------|-----------------------------------|------------------------------------|------------------------------------|------------------------------------|
| Quinic acid            | ND                                 | ND                                 | ND                                | ND                                 | ND                                | ND                                 | 0.1695 ± 0.0044                    | ND                                 |
| Protocatechuic acid    | 0.0462 ± 0.0005 <sup>c</sup>       | 0.0505 ± 0.0005 <sup>b</sup>       | 0.0525 ± 0.0027 <sup>bc</sup>     | 0.0578 ± 0.0003 <sup>b</sup>       | 0.0557 ± 0.0003 <sup>b</sup>      | 0.0925 ± 0.0043 <sup>a</sup>       | 0.0381 ± 0.0004 <sup>d</sup>       | 0.0874 ± 0.0023 <sup>a</sup>       |
| Gallic acid            | 0.0071 ± 0.0004 <sup>a</sup>       | 0.0023 ± 0.0005 <sup>b</sup>       | ND                                | ND                                 | ND                                | ND                                 | NQ                                 | NQ                                 |
| (+)-Catechin           | ND                                 | ND                                 | 0.0771 ± 0.0009 <sup>c</sup>      | 0.0501 ± 0.0007 <sup>c</sup>       | 0.0709 ± 0.0011 <sup>cd</sup>     | 0.0652 ± 0.0006 <sup>d</sup>       | 0.1308 ± 0.0007 <sup>b</sup>       | 0.2186 ± 0.0066 <sup>a</sup>       |
| Syringic acid          | ND                                 | ND                                 | ND                                | ND                                 | ND                                | ND                                 | 0.1070 ± 0.0019                    | ND                                 |
| Chlorogenic acid       | 0.1547 ± 0.0003 <sup>b</sup>       | 0.1851 ± 0.0038 <sup>a</sup>       | 0.1302 ± 0.0005 <sup>d</sup>      | 0.1475 ± 0.0005 <sup>c</sup>       | ND                                | ND                                 | ND                                 | ND                                 |
| 4-Hydroxybenzoic acid  | 0.00004 ± 0.0000 <sup>c</sup>      | 0.0029 ± 0.0038 <sup>c</sup>       | NQ                                | ND                                 | 0.2141 ± 0.0033 <sup>a</sup>      | 0.1891 ± 0.0042 <sup>b</sup>       | 0.0019 ± 0.0000 <sup>c</sup>       | 0.0015 ± 0.0001 <sup>c</sup>       |
| (-)-Epicatechin        | 0.1321 ± 0.0013 <sup>a</sup>       | 0.1218 ± 0.0012 <sup>b</sup>       | 0.1283 ± 0.0012 <sup>ab</sup>     | ND                                 | 0.0601 ± 0.0050 <sup>c</sup>      | ND                                 | ND                                 | ND                                 |
| Vanillic acid          | 0.1092 ± 0.0003 <sup>b</sup>       | 0.1199 ± 0.0002 <sup>a</sup>       | ND                                | ND                                 | ND                                | ND                                 | ND                                 | ND                                 |
| Sinapic acid           | 0.0086 ± 0.0001 <sup>f</sup>       | 0.0227 ± 0.0005 <sup>d</sup>       | 0.0061 ± 0.0004 <sup>f</sup>      | 0.0569 ± 0.0039 <sup>c</sup>       | 1.2475 ± 0.003 <sup>a</sup>       | 1.2365 ± 0.0016 <sup>b</sup>       | 0.0673 ± 0.0032 <sup>c</sup>       | 0.0303 ± 0.0002 <sup>d</sup>       |
| Ellagic acid           | ND                                 | ND                                 | 1.1919 ± 0.0002 <sup>b</sup>      | 1.1918 ± 0.0002 <sup>b</sup>       | ND                                | ND                                 | 1.1941 ± 0.0004 <sup>a</sup>       | ND                                 |
| Ferulic acid           | ND                                 | ND                                 | 0.0426 ± 0.0001 <sup>a</sup>      | 0.0359 ± 0.0002 <sup>d</sup>       | 0.0367 ± 0.0002 <sup>c</sup>      | 0.0375 ± 0.0001 <sup>b</sup>       | ND                                 | ND                                 |
| <b>Total phenolics</b> | <b>0.4579 ± 0.0528<sup>e</sup></b> | <b>0.5053 ± 0.0064<sup>d</sup></b> | <b>1.6287 ± 0.006<sup>b</sup></b> | <b>1.5402 ± 0.0059<sup>c</sup></b> | <b>1.6852 ± 0.013<sup>a</sup></b> | <b>1.6209 ± 0.0108<sup>b</sup></b> | <b>1.7012 ± 0.0109<sup>a</sup></b> | <b>0.3313 ± 0.0093<sup>f</sup></b> |

Means followed by the same letter on the line do not differ statistically from each other ( $p < 0.05$ ). CF = Control, broken ‘carioca’ beans without colonization; CFA = Mixture (70% broken ‘carioca’ beans + 20% rice bran + 10% broken rice), without colonization; 102F = flour from broken carioca beans cultivated with *Fistulina hepatica*; 134F = flour from broken carioca beans cultivated with *Pycnoporus sanguineus*; 161F = flour from broken carioca beans cultivated with *Laetiporus cincinnatus*; 102AF = Flour from the mixture, cultivated with *Fistulina hepatica*; 134AF = flour from the mixture, cultivated with *Pycnoporus sanguineus*; 161AF = flour from the mixture, cultivated with *Laetiporus cincinnatus*.

\*ND - not detected.

\*\*NQ - not quantifiable, below the limits of quantification.

**Table S2.** Cytotoxicity of extracts of flours from bean and rice co-products, fermented and non-fermented.

| Sample | GI <sub>50</sub> (µg/ml) |             |             |             |             |     |
|--------|--------------------------|-------------|-------------|-------------|-------------|-----|
|        | AGS                      | CaCo2       | MCF-7       | NCI-H460    | VERO        | RAW |
| CF     | -                        | -           | -           | -           | -           | -   |
| 102F   | 70.68 ± 7                | 27.38 ± 2   | 53.52 ± 5   | 189.54 ± 18 | 278.02 ± 14 | -   |
| 134F   | 197.99 ± 6               | 277.99 ± 3  | 203.48 ± 19 | -           | 380.13 ± 8  | -   |
| 161F   | -                        | -           | -           | -           | -           | -   |
| CFA    | -                        | -           | -           | -           | -           | -   |
| 102AF  | 194.55 ± 19              | 301.13 ± 20 | 238.65 ± 4  | 252.78 ± 20 | -           | -   |
| 134AF  | -                        | -           | -           | -           | -           | -   |
| 161AF  | 365.68 ± 16              | -           | -           | -           | -           | -   |

CF = Control, broken ‘carioca’ beans without colonization; CFA = Mixture (70% broken ‘carioca’ beans + 20% rice bran + 10% broken rice), without colonization; 102F = flour from broken carioca beans cultivated with *Fistulina hepatica*; 134F = flour from broken carioca beans cultivated with *Pycnoporus sanguineus*; 161F = flour from broken carioca beans cultivated with *Laetiporus cincinnatus*; 102AF = Flour from the mixture, cultivated with *Fistulina hepatica*; 134AF = flour from the mixture, cultivated with *Pycnoporus sanguineus*; 161AF = flour from the mixture, cultivated with *Laetiporus cincinnatus*.

**Table S3.** Amino acid profile (%) of flours from bean and rice co-products cultivated with macrofungi.

| Amino acid (%) | Broken beans       |                      |                       | Mixture (broken beans + rice co-products) |                      |                       |
|----------------|--------------------|----------------------|-----------------------|-------------------------------------------|----------------------|-----------------------|
|                | <i>F. hepatica</i> | <i>P. sanguineus</i> | <i>L. cincinnatus</i> | <i>F. hepatica</i>                        | <i>P. sanguineus</i> | <i>L. cincinnatus</i> |
| <b>Asp</b>     | 2.66               | 3.01                 | 2.57                  | 2.08                                      | 2.10                 | 1.96                  |
| <b>Glu</b>     | 3.25               | 3.59                 | 3.16                  | 2.72                                      | 2.85                 | 2.49                  |
| <b>Ser</b>     | 1.27               | 1.31                 | 1.28                  | 1.00                                      | 1.08                 | 0.98                  |
| <b>Gly</b>     | 1.11               | 1.41                 | 1.03                  | 0.96                                      | 1.01                 | 0.92                  |
| <b>His</b>     | 0.87               | 0.89                 | 0.84                  | 0.68                                      | 0.64                 | 0.72                  |
| <b>Tau</b>     | <0.01              | <0.01                | <0.01                 | <0.01                                     | <0.01                | <0.01                 |
| <b>Arg</b>     | 1.51               | 1.16                 | 1.39                  | 1.36                                      | 0.98                 | 1.15                  |
| <b>Thr*</b>    | 1.10               | 1.20                 | 1.08                  | 0.89                                      | 0.88                 | 0.83                  |
| <b>Ala</b>     | 1.15               | 1.25                 | 1.08                  | 0.98                                      | 0.95                 | 0.88                  |
| <b>Pro</b>     | 0.80               | 0.95                 | 0.79                  | 0.69                                      | 0.66                 | 0.68                  |
| <b>Tyr</b>     | 0.80               | 0.80                 | 0.74                  | 0.64                                      | 0.67                 | 0.60                  |
| <b>Val*</b>    | 1.42               | 1.56                 | 1.34                  | 1.16                                      | 1.15                 | 1.05                  |
| <b>Met*</b>    | 0.17               | 0.17                 | 0.15                  | 0.14                                      | 0.16                 | 0.13                  |
| <b>Cys</b>     | 0.24               | 0.33                 | 0.20                  | 0.18                                      | 0.21                 | 0.16                  |
| <b>Ile*</b>    | 1.19               | 1.29                 | 1.14                  | 0.95                                      | 0.95                 | 0.85                  |
| <b>Leu*</b>    | 1.76               | 1.80                 | 1.83                  | 1.45                                      | 1.55                 | 1.39                  |
| <b>Phe*</b>    | 1.29               | 1.31                 | 1.43                  | 1.06                                      | 1.18                 | 1.07                  |
| <b>Lys*</b>    | 1.30               | 0.98                 | 1.34                  | 0.91                                      | 0.66                 | 1.14                  |
| <b>Hyp</b>     | <0.01              | <0.01                | <0.01                 | <0.01                                     | <0.01                | <0.01                 |
| <b>Trp*</b>    | 0.33               | 0.52                 | 0.31                  | 0.31                                      | 0.31                 | 0.29                  |

\*Essential amino acid
